# Supplementary material for: Natural chalcopyrite as a sulfur source and its electrochemical performance for lithium–sulfur batteries
Source: Royal Society of Chemistry journal article supplement (doi:10.1039/c9qi00054b), 2019-01-01
Supplement: c9qi00054b1.pdf [file c9qi00054b1.pdf]

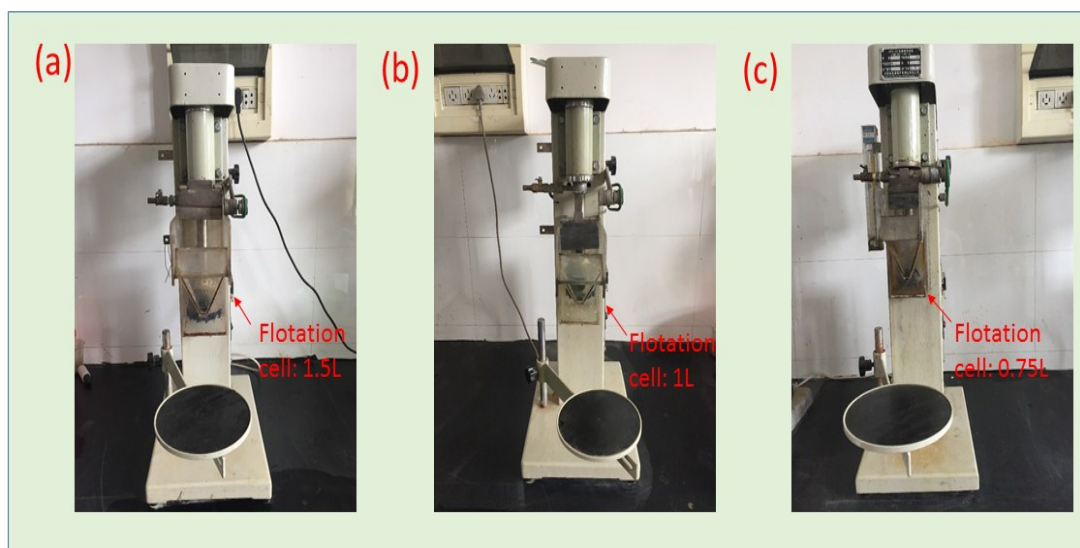

Figure S1. The photo images of flotation machine which are (a) handling capacity of 1.5 L, (b) handling capacity of 1 L and (c) handling capacity of 0.75 L.
